# Supplementary material for: Adaptation of Artificial Intelligence to Everyday Life for a Sustainable World: A Comparative Analysis of Artificial Intelligence and Teacher Decision-Making
Source: Preprints.org preprint supplement (doi:10.20944/preprints202409.1339.v1), 2024-09-17
Supplement: Supplementary file 1 [file supplementary]

**Supplementary Figures and Tables**

**Table 1. Comparison of Teachers' and AI's Responses to Ethical Dilemma Scenarios.**

|  | **Artificial İntelligence (AI)** | **Teachers** | **Total** |
| --- | --- | --- | --- |
| **Moral Integrity and Social Responsibility Dilemma** |  |  |  |
| Situational Ethics | 100,0% | 10,6% | 11,3% |
| Social Justice Ethics | 0 | 12,8% | 12,7% |
| Virtue Ethics | 0 | 41,1% | 40,8% |
| Deontological Ethics | 0 | 12,8% | 12,7% |
| Utilitarianism | 0 | 19,9% | 19,7% |
|  |  |  |  |
| **Justice and Cultural Sensitivity Dilemma** |  |  |  |
| Situational Ethics | 0 | 8,5% | 8,5% |
| Social Justice Ethics | 0 | 4,3% | 4,2% |
| Virtue Ethics | 0 | 3,5% | 3,5% |
| Deontological Ethics | 100,0% | 60,3% | 60,6% |
| Utilitarianism | 0 | 23,4% | 23,2% |
|  |  |  |  |
| **Equality and Managing Individual Differences** |  |  |  |
| Situational Ethics | 0 | 2,8% | 2,8% |
| Social Justice Ethics | 0 | 0,7% | 0,7% |
| Virtue Ethics | 100,0% | 67,4% | 67,6% |
| Deontological Ethics | 0 | 16,3% | 16,2% |
| Utilitarianism | 0 | 14,2% | 14,1% |
|  |  |  |  |
| **Individual Needs and Collective Responsibility Dilemma** |  |  |  |
| Situational Ethics | 0 | 7,1% | 7,0% |
| Social Justice Ethics | 0 | 12,8% | 12,7% |
| Virtue Ethics | 0 | 18,4% | 18,3% |
| Deontological Ethics | 100,0% | 45,4% | 45,8% |
| Utilitarianism | 0 | 15,6% | 15,5% |
|  |  |  |  |
| **Fair Assessment and Rewarding Effort Dilemma** |  |  |  |
| Situational Ethics | 0 | 14,2% | 14,1% |
| Social Justice Ethics | 0 | 4,3% | 4,2% |
| Virtue Ethics | 0 | 53,9% | 53,5% |
| Deontological Ethics | 0 | 27,0% | 26,8% |
| Utilitarianism | 100,0% | 2,8% | 3,5% |
|  |  |  |  |
| **Privacy and Professional Help Dilemma** |  |  |  |
| Situational Ethics | 0 | 7,8% | 7,7% |
| Social Justice Ethics | 0 | 46,8% | 46,5% |
| Virtue Ethics | 100,0% | 19,1% | 19,7% |
| Deontological Ethics | 0 | 24,1% | 23,9% |
| Utilitarianism | 0 | 1,4% | 1,4% |
|  |  |  |  |
| **Ethics of Assessment and Evaluation Dilemma** |  |  |  |
| Situational Ethics | 0 | 2,8% | 2,8% |
| Social Justice Ethics | 100,0% | 48,9% | 49,3% |
| Virtue Ethics | 0 | 31,9% | 31,7% |
| Deontological Ethics | 0 | 16,3% | 16,2% |
| Utilitarianism | 0 | 0 |  |
|  |  |  |  |
| **Individual Needs and Institutional Justice Dilemma** |  |  |  |
| Situational Ethics | 0 | 5,7% | 5,6% |
| Social Justice Ethics | 0 | 2,8% | 2,8% |
| Virtue Ethics | 0 | 28,4% | 28,2% |
| Deontological Ethics | 100,0% | 48,2% | 48,6% |
| Utilitarianism | 0 | 13,5% | 13,4% |
|  |  |  |  |
| SUM | 800,00 | 797,87 | 797,89 |
| N = Documents | 100,00 | 100,00 | 100,00 |

**Table 2. Male And Female And Artificial Intelligence**

|  | Male | Female | Artificial İntelligence (AI) | Total |
| --- | --- | --- | --- | --- |
| **Moral Integrity and Social Responsibility Dilemma** |  |  |  |  |
| Situational Ethics | 3,8% | 14,6% | 100,0% | 11,3% |
| Social Justice Ethics | 7,7% | 15,7% | 0 | 12,7% |
| Virtue Ethics | 42,3% | 40,4% | 0 | 40,8% |
| Deontological Ethics | 17,3% | 10,1% | 0 | 12,7% |
| Utilitarianism | 28,8% | 14,6% | 0 | 19,7% |
|  |  |  |  |  |
| **Justice and Cultural Sensitivity Dilemma** |  |  |  |  |
| Situational Ethics | 7,7% | 9,0% | 0 | 8,5% |
| Social Justice Ethics | 5,8% | 3,4% | 0 | 4,2% |
| Virtue Ethics | 1,9% | 4,5% | 0 | 3,5% |
| Deontological Ethics | 61,5% | 59,6% | 100,0% | 60,6% |
| Utilitarianism | 21,2% | 24,7% | 0 | 23,2% |
|  |  |  |  |  |
| **Equality and Managing Individual Differences** |  |  |  |  |
| Situational Ethics | 0 | 4,5% | 0 | 2,8% |
| Social Justice Ethics | 0 | 1,1% | 0 | 0,7% |
| Virtue Ethics | 67,3% | 67,4% | 100,0% | 67,6% |
| Deontological Ethics | 13,5% | 18,0% | 0 | 16,2% |
| Utilitarianism | 23,1% | 9,0% | 0 | 14,1% |
|  |  |  |  |  |
| **Individual Needs and Collective Responsibility Dilemma** |  |  |  |  |
| Situational Ethics | 5,8% | 7,9% | 0 | 7,0% |
| Social Justice Ethics | 15,4% | 11,2% | 0 | 12,7% |
| Virtue Ethics | 23,1% | 15,7% | 0 | 18,3% |
| Deontological Ethics | 32,7% | 52,8% | 100,0% | 45,8% |
| Utilitarianism | 23,1% | 11,2% | 0 | 15,5% |
|  |  |  |  |  |
| **Fair Assessment and Rewarding Effort Dilemma** |  |  |  |  |
| Situational Ethics | 13,5% | 14,6% | 0 | 14,1% |
| Social Justice Ethics | 3,8% | 4,5% | 0 | 4,2% |
| Virtue Ethics | 46,2% | 58,4% | 0 | 53,5% |
| Deontological Ethics | 28,8% | 25,8% | 0 | 26,8% |
| Utilitarianism | 5,8% | 1,1% | 100,0% | 3,5% |
|  |  |  |  |  |
| **Privacy and Professional Help Dilemma** |  |  |  |  |
| Situational Ethics | 7,7% | 7,9% | 0 | 7,7% |
| Social Justice Ethics | 51,9% | 43,8% | 0 | 46,5% |
| Virtue Ethics | 19,2% | 19,1% | 100,0% | 19,7% |
| Deontological Ethics | 21,2% | 25,8% | 0 | 23,9% |
| Utilitarianism | 0 | 2,2% | 0 | 1,4% |
|  |  |  |  |  |
| **Ethics of Assessment and Evaluation Dilemma** | 0 | 0 | 0 |  |
| Situational Ethics | 1,9% | 3,4% | 0 | 2,8% |
| Social Justice Ethics | 53,8% | 46,1% | 100,0% | 49,3% |
| Virtue Ethics | 25,0% | 36,0% | 0 | 31,7% |
| Deontological Ethics | 19,2% | 14,6% | 0 | 16,2% |
| Utilitarianism | 0 | 0 | 0 |  |
|  |  |  |  |  |
| **Individual Needs and Institutional Justice Dilemma** | 0 | 0 | 0 |  |
| Situational Ethics | 5,8% | 5,6% | 0 | 5,6% |
| Social Justice Ethics | 0 | 4,5% | 0 | 2,8% |
| Virtue Ethics | 19,2% | 33,7% | 0 | 28,2% |
| Deontological Ethics | 59,6% | 41,6% | 100,0% | 48,6% |
| Utilitarianism | 15,4% | 12,4% | 0 | 13,4% |
|  |  |  |  |  |
| SUM | 800,00 | 796,63 | 800,00 | 797,89 |
| N = Documents | 100,00 | 100,00 | 100,00 | 100,00 |

**Table 3. School Level Where Teachers Work**

|  | Primary school | Middle School | Hıgh School | Artificial İntelligence (AI) | Total |
| --- | --- | --- | --- | --- | --- |
| **Moral Integrity and Social Responsibility Dilemma** |  |  |  |  |  |
| Situational Ethics | 21,4% | 8,8% | 11,1% | 100,0% | 11,3% |
| Social Justice Ethics | 7,1% | 11,0% | 19,4% | 0 | 12,7% |
| Virtue Ethics | 42,9% | 39,6% | 44,4% | 0 | 40,8% |
| Deontological Ethics | 7,1% | 16,5% | 5,6% | 0 | 12,7% |
| Utilitarianism | 21,4% | 20,9% | 16,7% | 0 | 19,7% |
|  |  |  |  |  |  |
| **Justice and Cultural Sensitivity Dilemma** |  |  |  |  |  |
| Situational Ethics | 7,1% | 7,7% | 11,1% | 0 | 8,5% |
| Social Justice Ethics | 7,1% | 5,5% | 0 | 0 | 4,2% |
| Virtue Ethics | 0 | 4,4% | 2,8% | 0 | 3,5% |
| Deontological Ethics | 64,3% | 57,1% | 66,7% | 100,0% | 60,6% |
| Utilitarianism | 21,4% | 25,3% | 19,4% | 0 | 23,2% |
|  |  |  |  |  |  |
| **Equality and Managing Individual Differences** |  |  |  |  |  |
| Situational Ethics | 7,1% | 3,3% | 0 | 0 | 2,8% |
| Social Justice Ethics | 0 | 1,1% | 0 | 0 | 0,7% |
| Virtue Ethics | 71,4% | 62,6% | 77,8% | 100,0% | 67,6% |
| Deontological Ethics | 14,3% | 17,6% | 13,9% | 0 | 16,2% |
| Utilitarianism | 7,1% | 16,5% | 11,1% | 0 | 14,1% |
|  |  |  |  |  |  |
| **Individual Needs and Collective Responsibility Dilemma** |  |  |  |  |  |
| Situational Ethics | 7,1% | 7,7% | 5,6% | 0 | 7,0% |
| Social Justice Ethics | 14,3% | 11,0% | 16,7% | 0 | 12,7% |
| Virtue Ethics | 14,3% | 17,6% | 22,2% | 0 | 18,3% |
| Deontological Ethics | 28,6% | 51,6% | 36,1% | 100,0% | 45,8% |
| Utilitarianism | 35,7% | 11,0% | 19,4% | 0 | 15,5% |
|  |  |  |  |  |  |
| **Fair Assessment and Rewarding Effort Dilemma** |  |  |  |  |  |
| Situational Ethics | 28,6% | 11,0% | 16,7% | 0 | 14,1% |
| Social Justice Ethics | 0 | 5,5% | 2,8% | 0 | 4,2% |
| Virtue Ethics | 50,0% | 54,9% | 52,8% | 0 | 53,5% |
| Deontological Ethics | 14,3% | 31,9% | 19,4% | 0 | 26,8% |
| Utilitarianism | 7,1% | 0 | 8,3% | 100,0% | 3,5% |
|  |  |  |  |  |  |
| **Privacy and Professional Help Dilemma** |  |  |  |  |  |
| Situational Ethics | 0 | 5,5% | 16,7% | 0 | 7,7% |
| Social Justice Ethics | 57,1% | 45,1% | 47,2% | 0 | 46,5% |
| Virtue Ethics | 7,1% | 20,9% | 19,4% | 100,0% | 19,7% |
| Deontological Ethics | 35,7% | 26,4% | 13,9% | 0 | 23,9% |
| Utilitarianism | 0 | 1,1% | 2,8% | 0 | 1,4% |
|  |  |  |  |  |  |
| **Ethics of Assessment and Evaluation Dilemma** |  |  |  |  |  |
| Situational Ethics | 0 | 3,3% | 2,8% | 0 | 2,8% |
| Social Justice Ethics | 28,6% | 50,5% | 52,8% | 100,0% | 49,3% |
| Virtue Ethics | 57,1% | 29,7% | 27,8% | 0 | 31,7% |
| Deontological Ethics | 14,3% | 16,5% | 16,7% | 0 | 16,2% |
| Utilitarianism | 0 | 0 | 0 | 0 |  |
|  |  |  |  |  |  |
| **Individual Needs and Institutional Justice Dilemma** |  |  |  |  |  |
| Situational Ethics | 0 | 5,5% | 8,3% | 0 | 5,6% |
| Social Justice Ethics | 7,1% | 2,2% | 2,8% | 0 | 2,8% |
| Virtue Ethics | 35,7% | 23,1% | 38,9% | 0 | 28,2% |
| Deontological Ethics | 42,9% | 54,9% | 33,3% | 100,0% | 48,6% |
| Utilitarianism | 14,3% | 13,2% | 13,9% | 0 | 13,4% |
|  |  |  |  |  |  |
| SUM | 800,00 | 797,80 | 797,22 | 800,00 | 797,89 |
| N = Documents | 100,00 | 100,00 | 100,00 | 100,00 | 100,00 |

**Table 4. Comparison By Teacher Experience**

|  | 0-5 | 6-10 | 11-15 | 16-20 | Over 20 Years | Artificial İntelligence (AI) | Total |
| --- | --- | --- | --- | --- | --- | --- | --- |
| **Moral Integrity and Social Responsibility Dilemma** |  |  |  |  |  |  |  |
| Situational Ethics | 9,1% | 16,7% | 13,5% | 8,3% | 5,9% | 100,0% | 11,3% |
| Social Justice Ethics | 9,1% | 16,7% | 18,9% | 8,3% | 8,8% | 0 | 12,7% |
| Virtue Ethics | 31,8% | 20,8% | 37,8% | 54,2% | 55,9% | 0 | 40,8% |
| Deontological Ethics | 27,3% | 25,0% | 10,8% | 0 | 5,9% | 0 | 12,7% |
| Utilitarianism | 18,2% | 16,7% | 18,9% | 29,2% | 17,6% | 0 | 19,7% |
|  |  |  |  |  |  |  |  |
| **Justice and Cultural Sensitivity Dilemma** |  |  |  |  |  |  |  |
| Situational Ethics | 13,6% | 4,2% | 2,7% | 16,7% | 8,8% | 0 | 8,5% |
| Social Justice Ethics | 0 | 12,5% | 0 | 0 | 8,8% | 0 | 4,2% |
| Virtue Ethics | 9,1% | 8,3% | 2,7% | 0 | 0 | 0 | 3,5% |
| Deontological Ethics | 68,2% | 66,7% | 62,2% | 50,0% | 55,9% | 100,0% | 60,6% |
| Utilitarianism | 13,6% | 8,3% | 29,7% | 33,3% | 26,5% | 0 | 23,2% |
|  |  |  |  |  |  |  |  |
| **Equality and Managing Individual Differences** | 0 | 0 | 0 | 0 | 0 | 0 |  |
| Situational Ethics | 0 | 8,3% | 2,7% | 4,2% | 0 | 0 | 2,8% |
| Social Justice Ethics | 0 | 0 | 0 | 0 | 2,9% | 0 | 0,7% |
| Virtue Ethics | 59,1% | 50,0% | 67,6% | 75,0% | 79,4% | 100,0% | 67,6% |
| Deontological Ethics | 22,7% | 16,7% | 10,8% | 16,7% | 17,6% | 0 | 16,2% |
| Utilitarianism | 13,6% | 25,0% | 18,9% | 12,5% | 2,9% | 0 | 14,1% |
|  |  |  |  |  |  |  |  |
| **Individual Needs and Collective Responsibility Dilemma** |  |  |  |  |  |  |  |
| Situational Ethics | 0 | 16,7% | 5,4% | 4,2% | 8,8% | 0 | 7,0% |
| Social Justice Ethics | 9,1% | 12,5% | 10,8% | 25,0% | 8,8% | 0 | 12,7% |
| Virtue Ethics | 18,2% | 16,7% | 18,9% | 8,3% | 26,5% | 0 | 18,3% |
| Deontological Ethics | 59,1% | 45,8% | 48,6% | 50,0% | 29,4% | 100,0% | 45,8% |
| Utilitarianism | 13,6% | 8,3% | 16,2% | 8,3% | 26,5% | 0 | 15,5% |
|  |  |  |  |  |  |  |  |
| **Fair Assessment and Rewarding Effort Dilemma** |  |  |  |  |  |  |  |
| Situational Ethics | 9,1% | 16,7% | 13,5% | 12,5% | 17,6% | 0 | 14,1% |
| Social Justice Ethics | 9,1% | 8,3% | 0 | 0 | 5,9% | 0 | 4,2% |
| Virtue Ethics | 50,0% | 50,0% | 54,1% | 54,2% | 58,8% | 0 | 53,5% |
| Deontological Ethics | 27,3% | 25,0% | 35,1% | 25,0% | 20,6% | 0 | 26,8% |
| Utilitarianism | 9,1% | 0 | 2,7% | 4,2% | 0 | 100,0% | 3,5% |
|  |  |  |  |  |  |  |  |
| **Privacy and Professional Help Dilemma** |  |  |  |  |  |  |  |
| Situational Ethics | 4,5% | 8,3% | 8,1% | 12,5% | 5,9% | 0 | 7,7% |
| Social Justice Ethics | 45,5% | 41,7% | 54,1% | 62,5% | 32,4% | 0 | 46,5% |
| Virtue Ethics | 13,6% | 8,3% | 16,2% | 16,7% | 35,3% | 100,0% | 19,7% |
| Deontological Ethics | 36,4% | 37,5% | 21,6% | 8,3% | 20,6% | 0 | 23,9% |
| Utilitarianism | 0 | 0 | 0 | 0 | 5,9% | 0 | 1,4% |
|  |  |  |  |  |  |  |  |
| **Ethics of Assessment and Evaluation Dilemma** |  |  |  |  |  |  |  |
| Situational Ethics | 0 | 8,3% | 0 | 4,2% | 2,9% | 0 | 2,8% |
| Social Justice Ethics | 45,5% | 41,7% | 54,1% | 58,3% | 44,1% | 100,0% | 49,3% |
| Virtue Ethics | 40,9% | 37,5% | 32,4% | 25,0% | 26,5% | 0 | 31,7% |
| Deontological Ethics | 13,6% | 12,5% | 13,5% | 12,5% | 26,5% | 0 | 16,2% |
| Utilitarianism | 0 | 0 | 0 | 0 | 0 | 0 |  |
|  |  |  |  |  |  |  |  |
| **Individual Needs and Institutional Justice Dilemma** |  |  |  |  |  |  |  |
| Situational Ethics | 4,5% | 8,3% | 5,4% | 4,2% | 5,9% | 0 | 5,6% |
| Social Justice Ethics | 4,5% | 0 | 2,7% | 0 | 5,9% | 0 | 2,8% |
| Virtue Ethics | 27,3% | 12,5% | 35,1% | 33,3% | 29,4% | 0 | 28,2% |
| Deontological Ethics | 54,5% | 54,2% | 37,8% | 58,3% | 44,1% | 100,0% | 48,6% |
| Utilitarianism | 9,1% | 25,0% | 16,2% | 4,2% | 11,8% | 0 | 13,4% |
|  |  |  |  |  |  |  |  |
| SUM | 800,00 | 791,67 | 800,00 | 800,00 | 797,06 | 800,00 | 797,89 |
| N = Documents | 100,00 | 100,00 | 100,00 | 100,00 | 100,00 | 100,00 | 100,00 |
